# Supplementary material
Source: ML conference proceedings conference paper supplement (https://openreview.net/forum?id=D7zMB5uEHw)
Supplement: supplementary_material [file mnist_CRFAE_k.pdf › visual_experiments/results/CRFAE/mnist_CRFAE_k.pdf]

$k = 1$

0 1 2 3 4 5 6 7 8 9

$k = 2$

0 1 2 3 4 5 6 7 8 9

$k = 3$

0 1 2 3 4 5 6 7 8 9

$k = 5$

0 1 2 3 4 5 6 7 8 9

$k = 10$

0 1 2 3 4 5 6 7 8 9

$k = 20$

0 1 2 3 4 5 6 7 8 9

$k = 50$

0 1 2 3 4 5 6 7 8 9

Original

0 1 2 3 4 5 6 7 8 9
