# Supplementary material
Source: ML conference proceedings conference paper supplement (https://openreview.net/forum?id=D7zMB5uEHw)

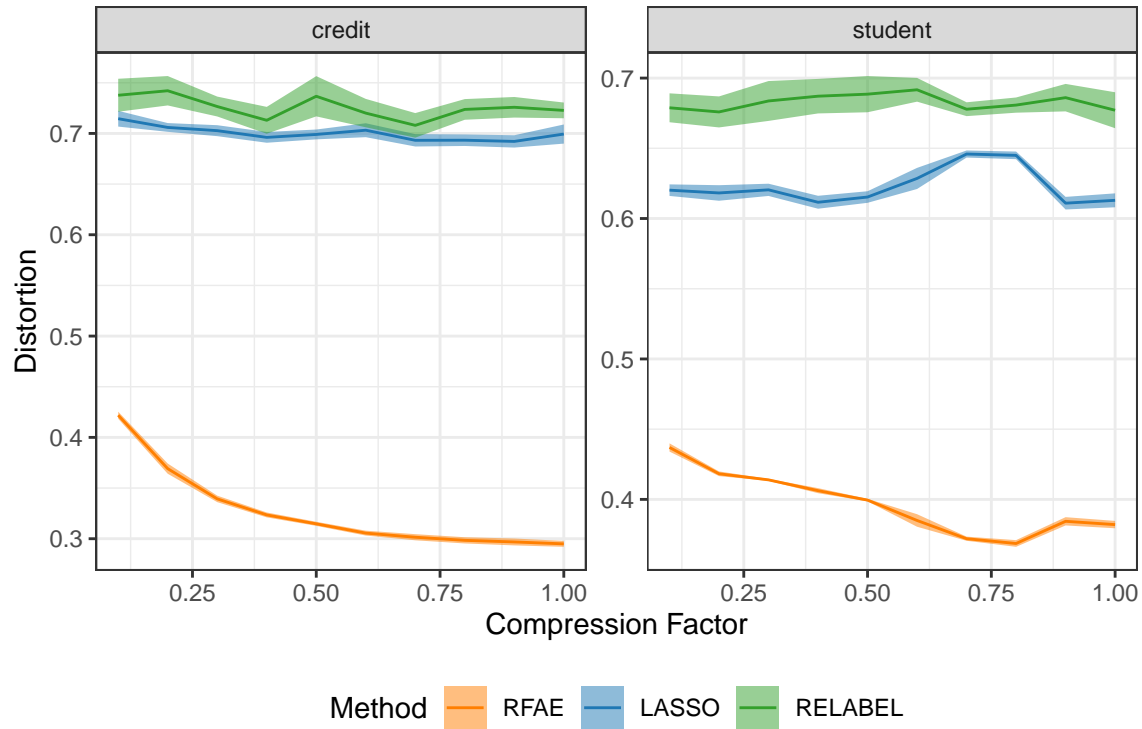

Supplement: supplementary_material [file decoder.pdf › compression_benchmarks/decoder_experiments/decoder.pdf]

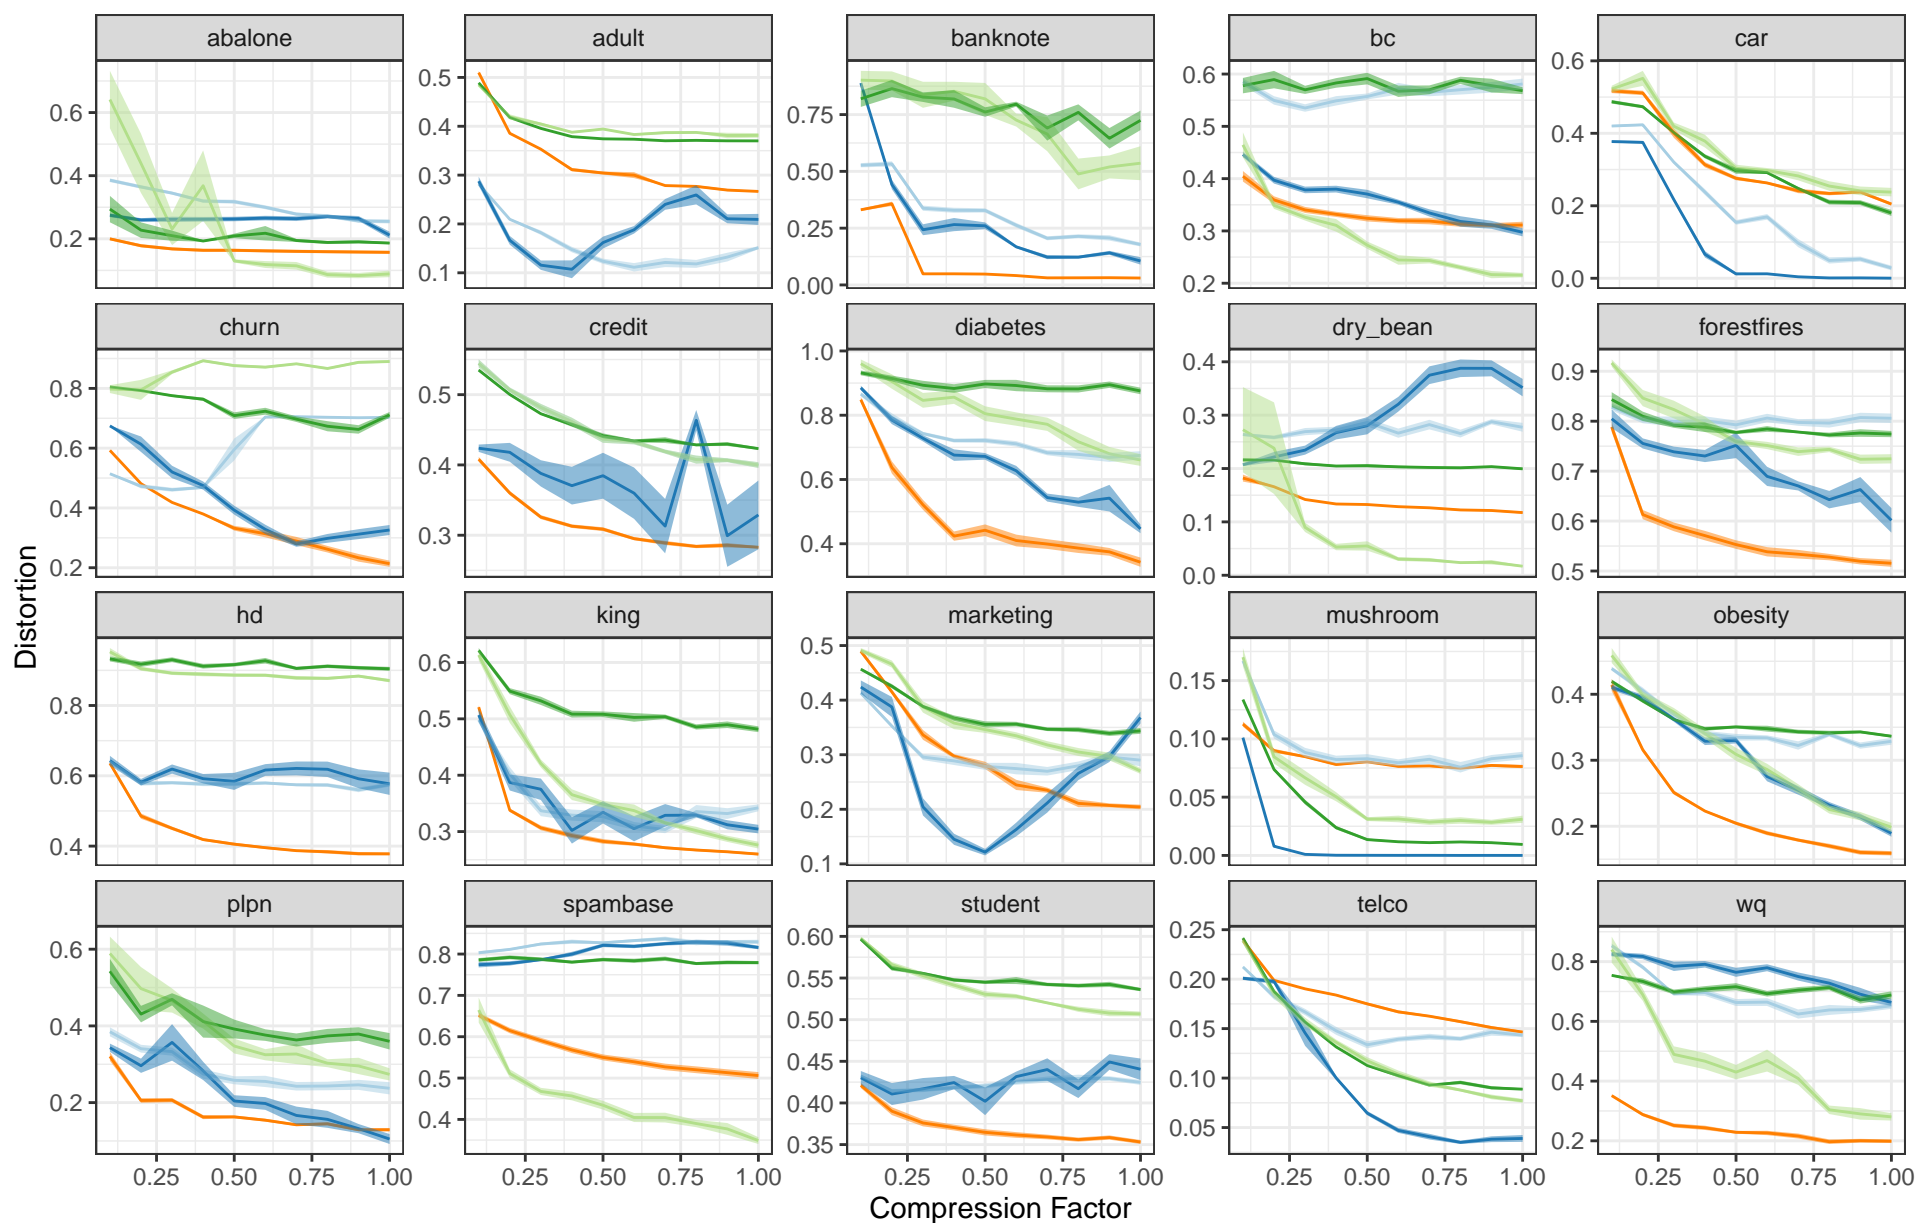

Method RFAE TVAE TTVAE AE VAE

Supplement: supplementary_material [file reconstruction.pdf › compression_benchmarks/reconstruction.pdf]

$B = 50$

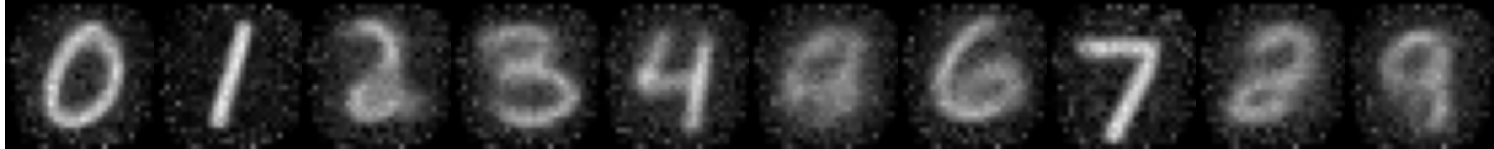

$B = 100$

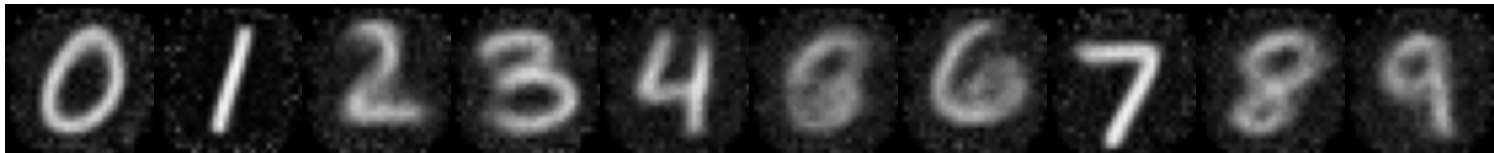

$B = 200$

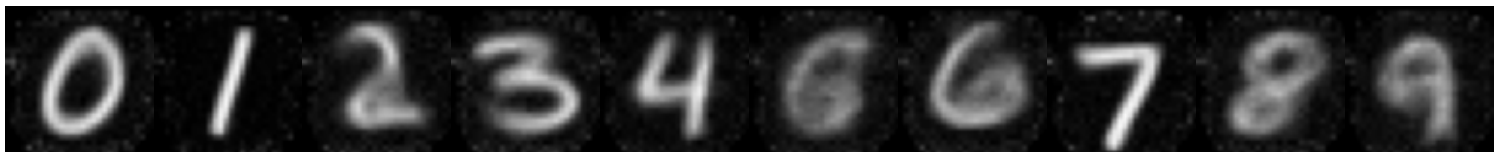

$B = 500$

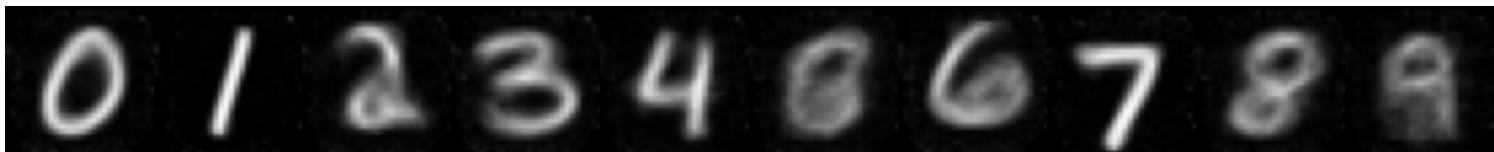

$B = 1000$

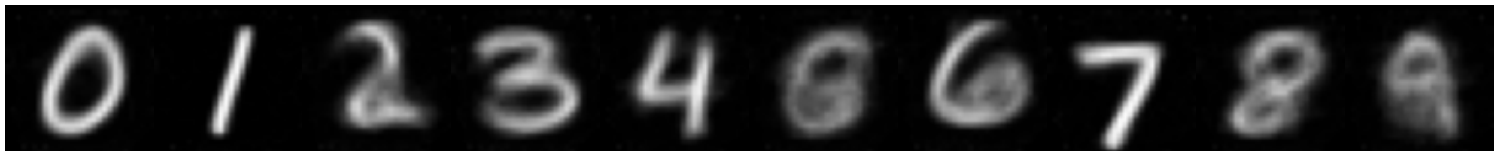

Original

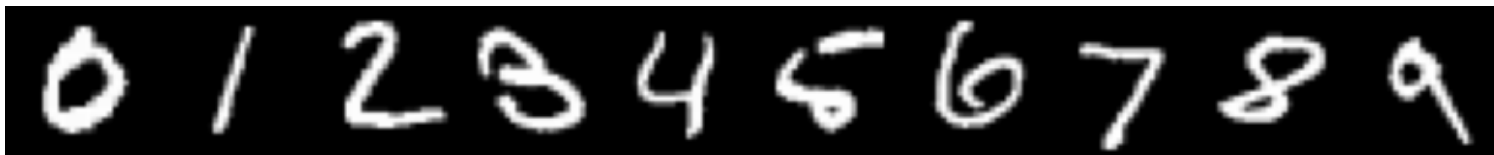

Supplement: supplementary_material [file mnist_CRFAE_B.pdf › visual_experiments/results/CRFAE/mnist_CRFAE_B.pdf]

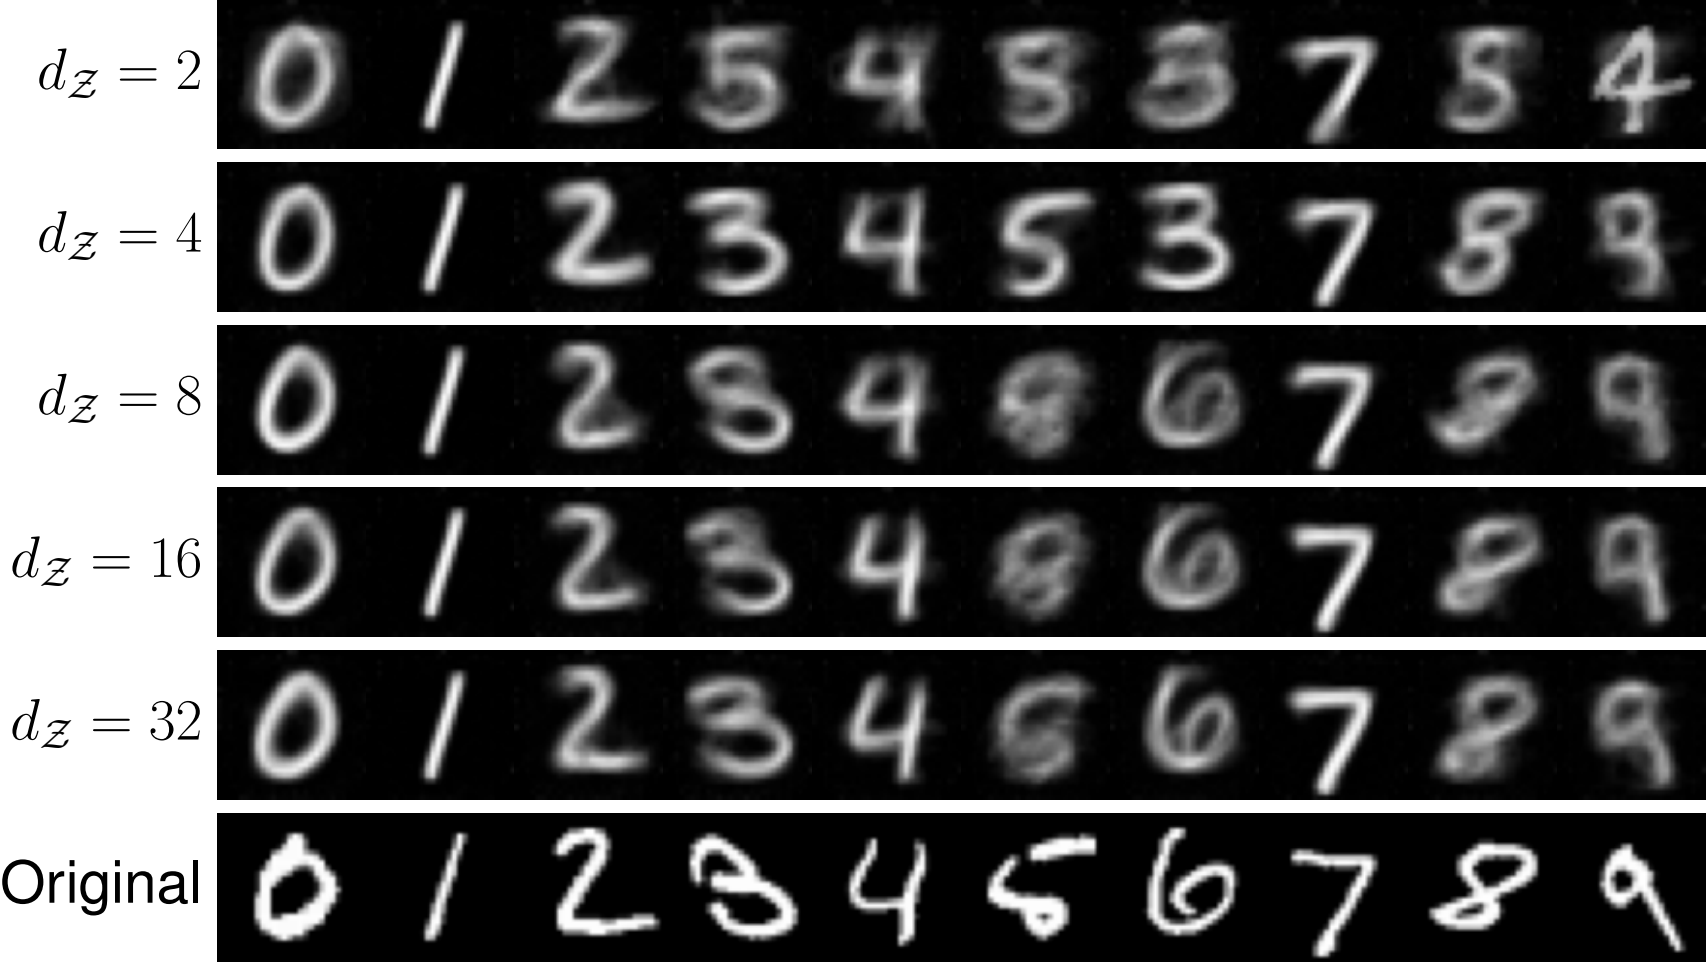

Supplement: supplementary_material [file mnist_CRFAE_d_Z.pdf › visual_experiments/results/CRFAE/mnist_CRFAE_d_Z.pdf]

RFAE (supervised)

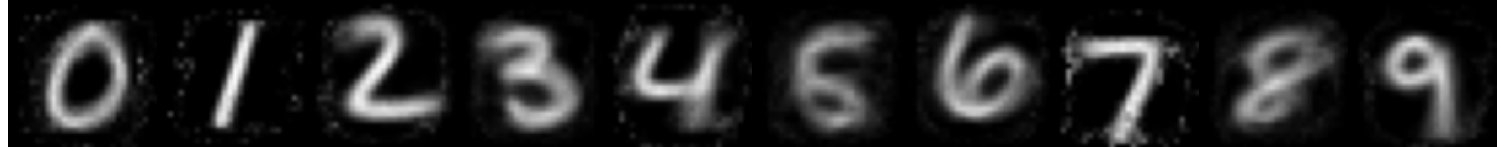

RFAE (completely random)

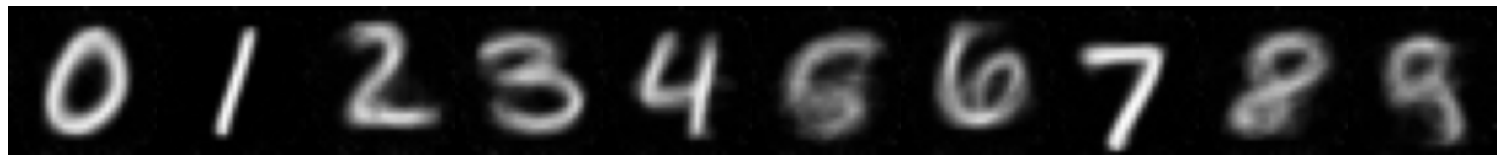

ConvAE

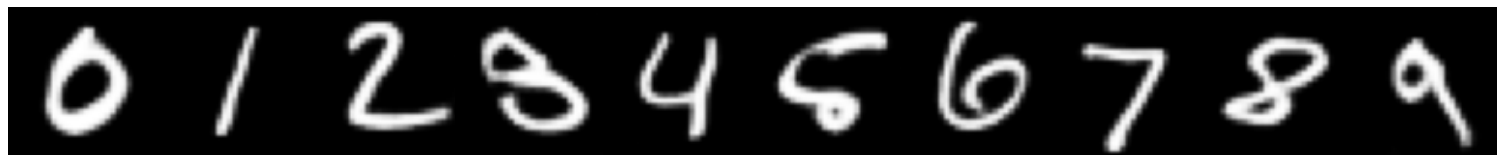

Original

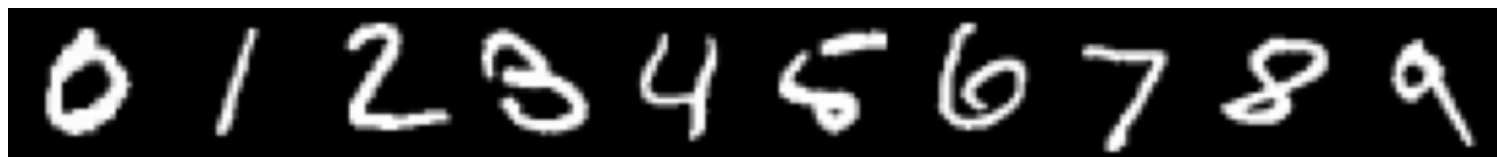

Supplement: supplementary_material [file mnist_CRFAE_method_comparison.pdf › visual_experiments/results/CRFAE/mnist_CRFAE_method_comparison.pdf]

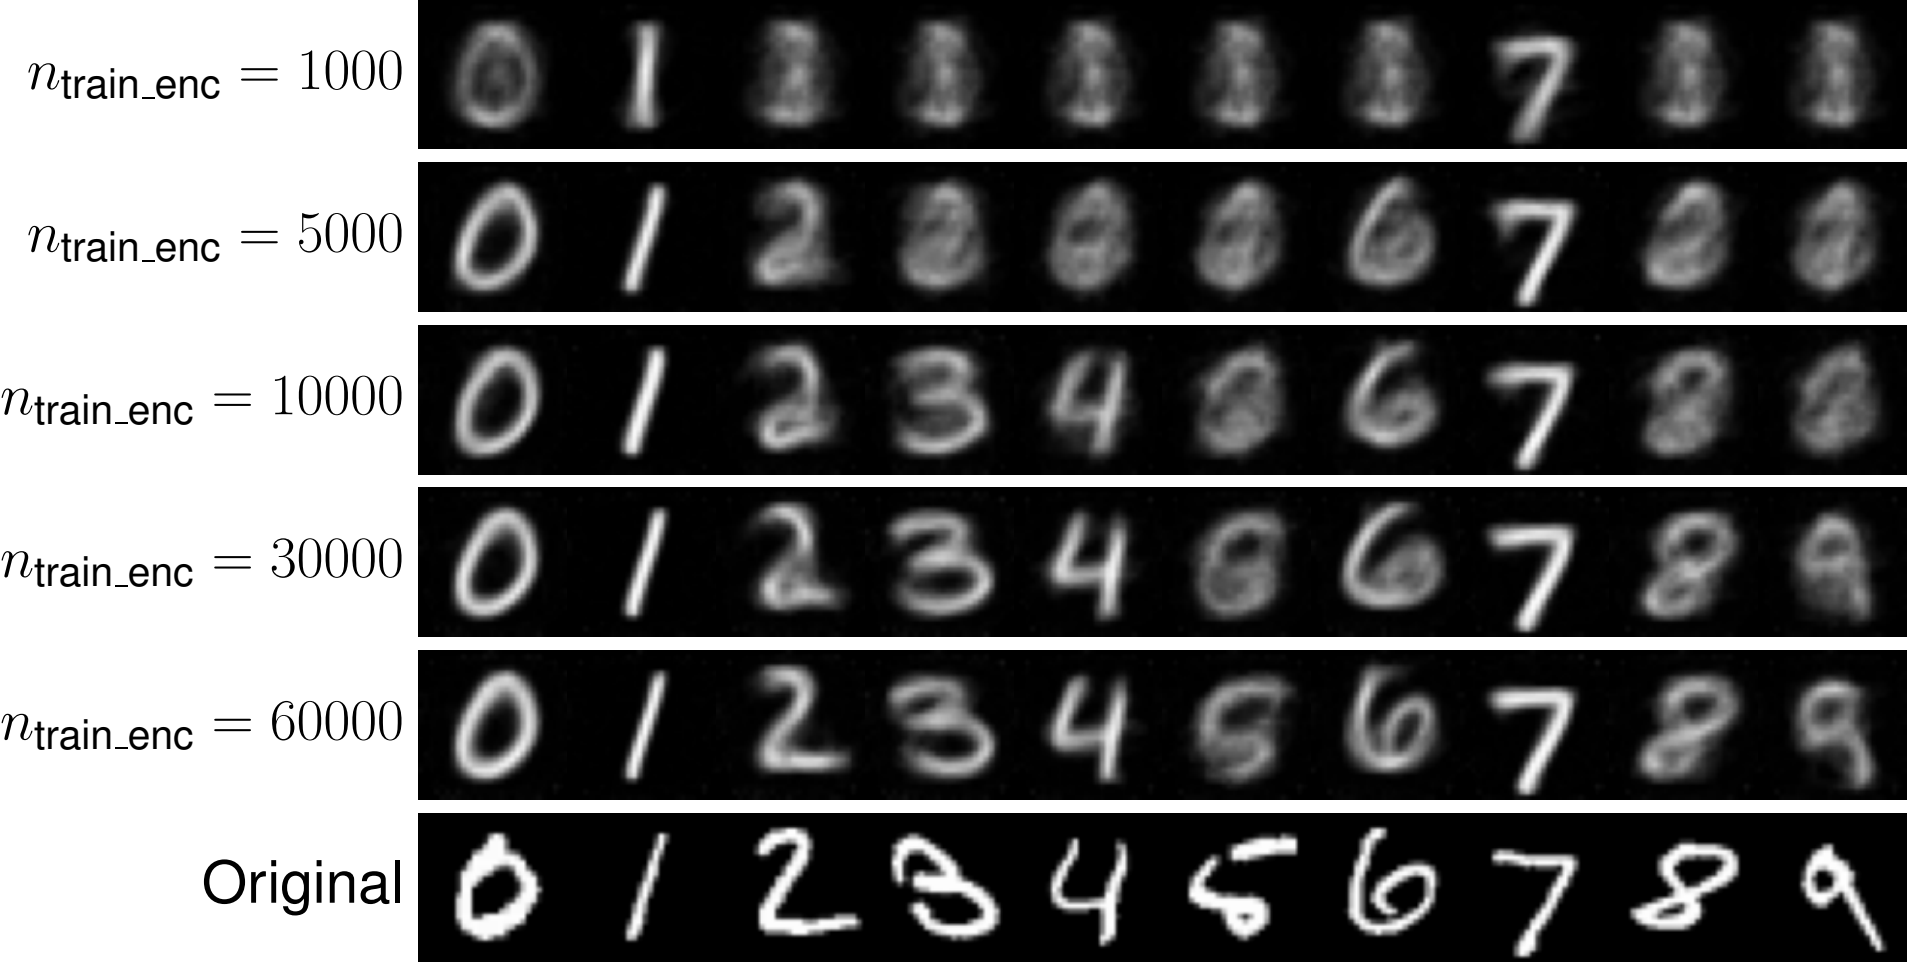

Supplement: supplementary_material [file mnist_CRFAE_n_train_enc.pdf › visual_experiments/results/CRFAE/mnist_CRFAE_n_train_enc.pdf]

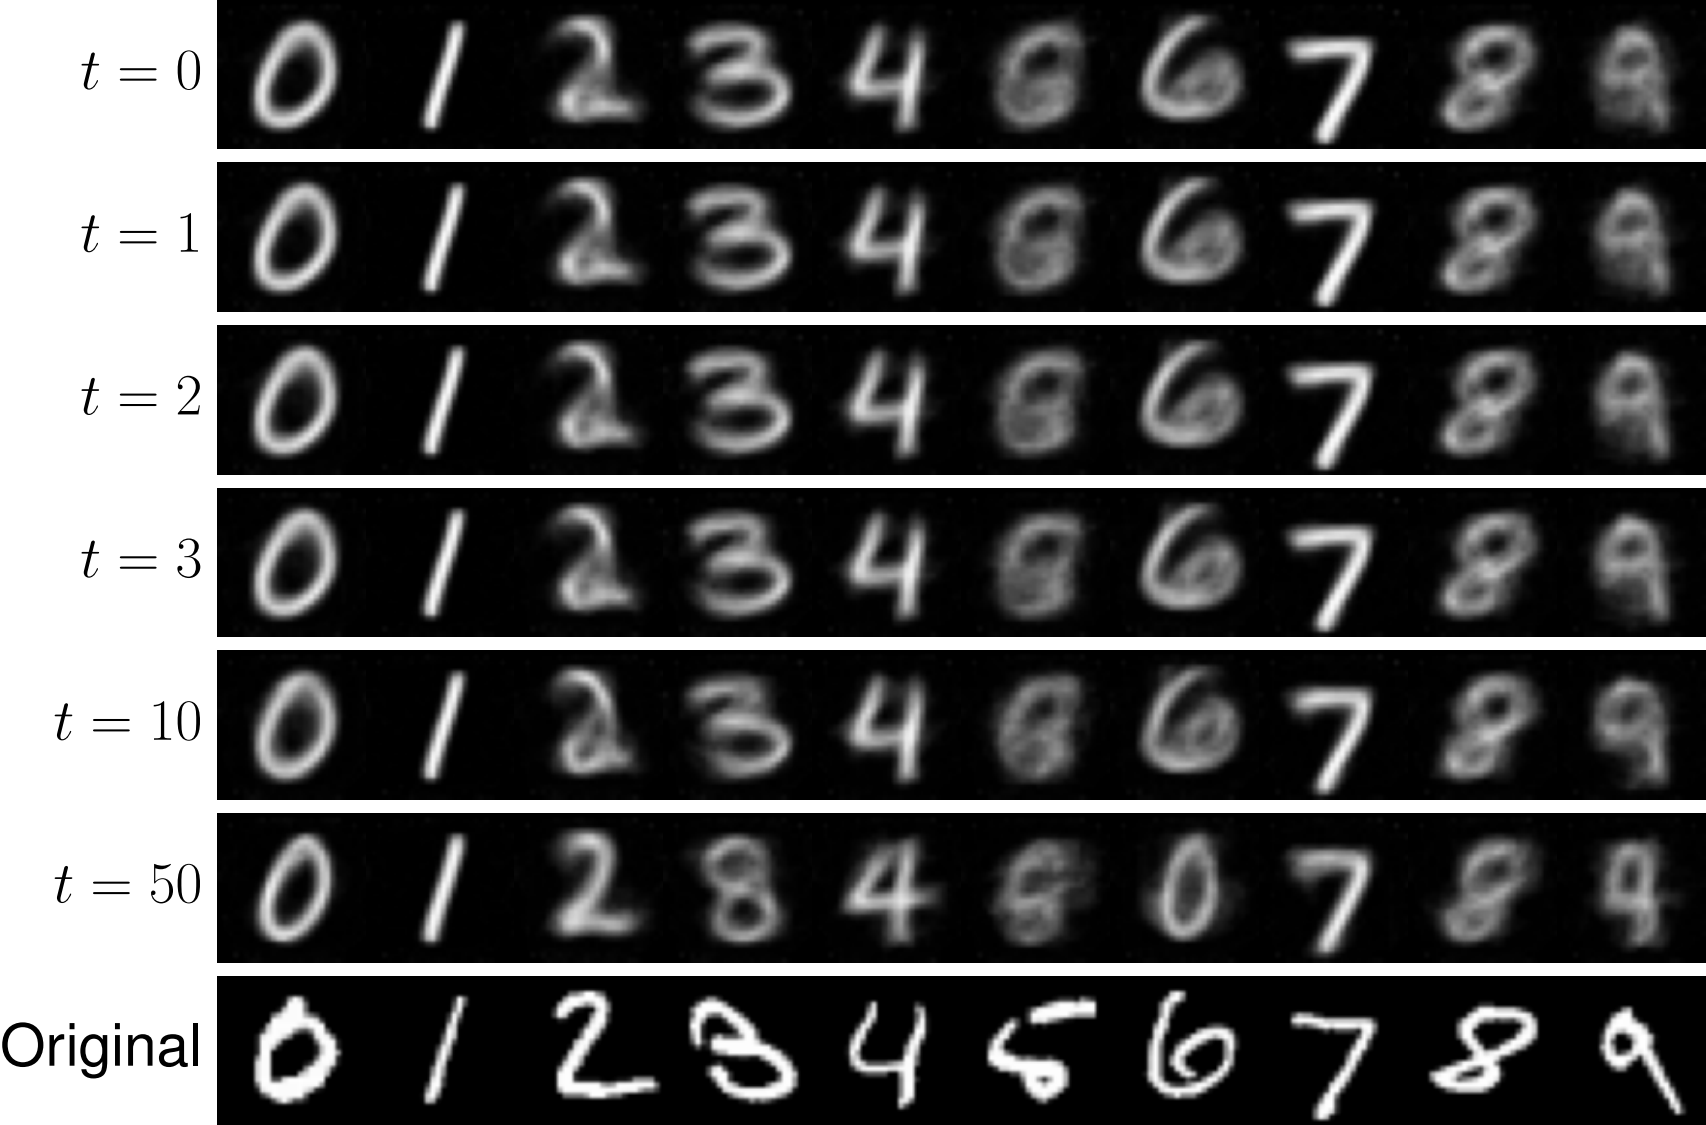

Supplement: supplementary_material [file mnist_CRFAE_t.pdf › visual_experiments/results/CRFAE/mnist_CRFAE_t.pdf]

$B = 50$

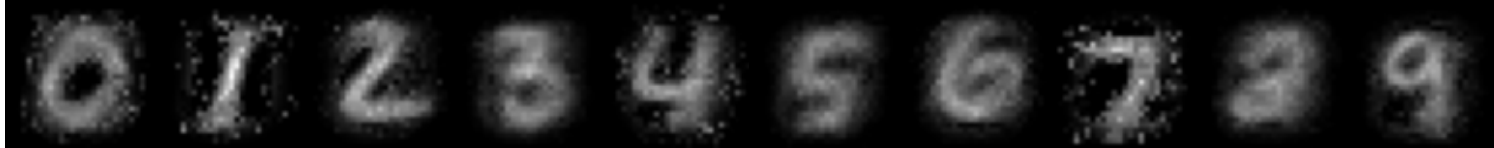

$B = 100$

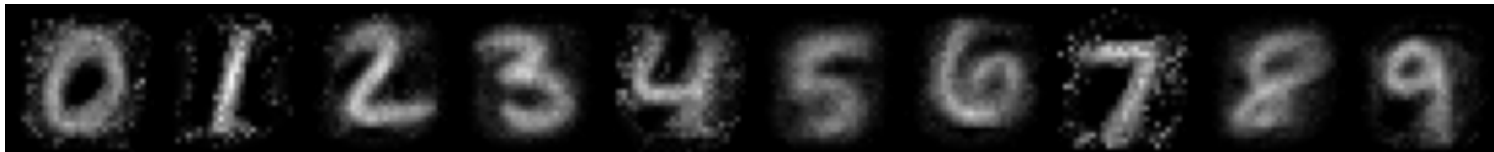

$B = 200$

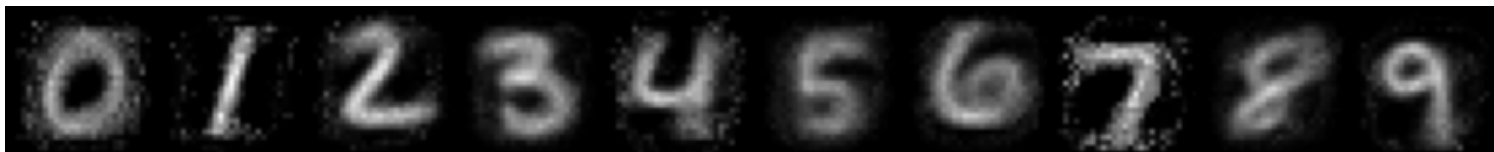

$B = 500$

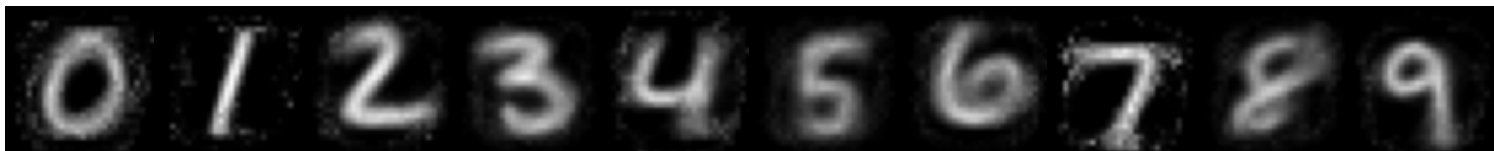

$B = 1000$

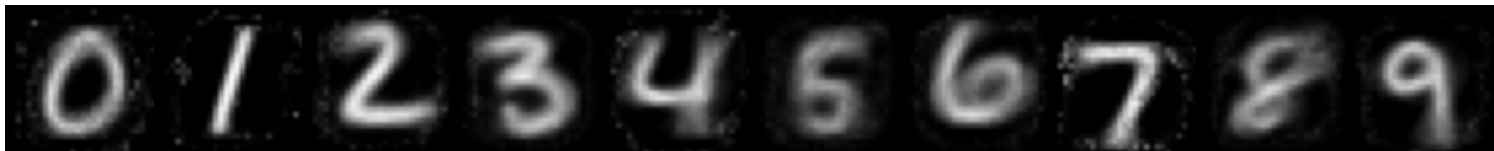

Original



Supplement: supplementary_material [file mnist_RFAE_B.pdf › visual_experiments/results/RFAE/mnist_RFAE_B.pdf]

$d_Z = 2$

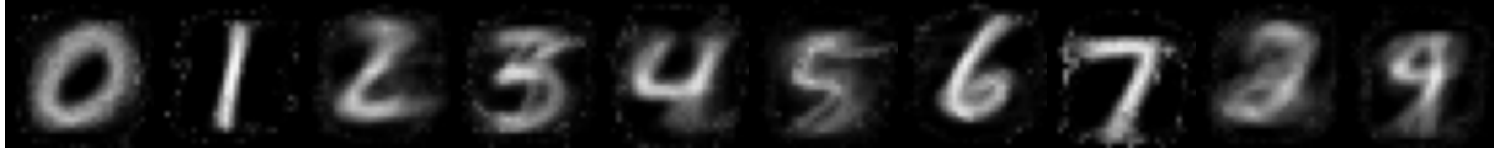

$d_Z = 4$

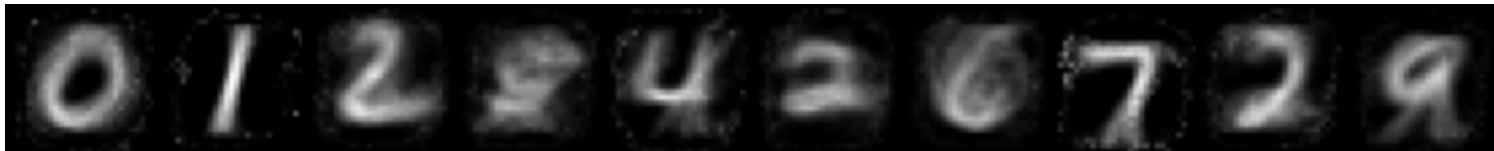

$d_Z = 8$

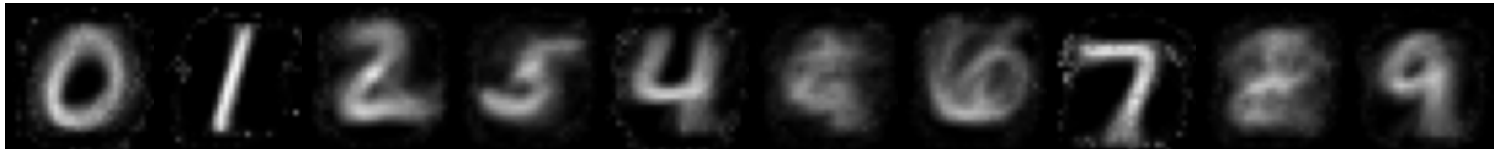

$d_Z = 16$

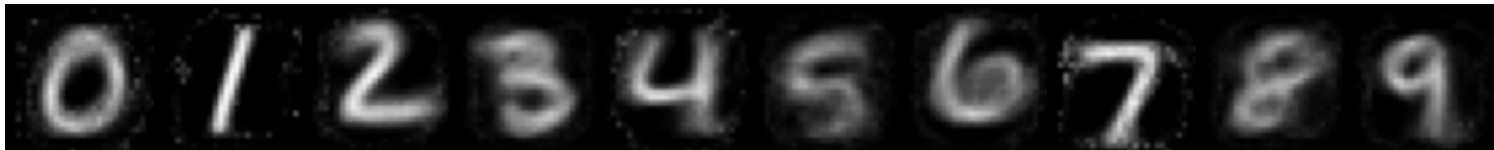

$d_Z = 32$

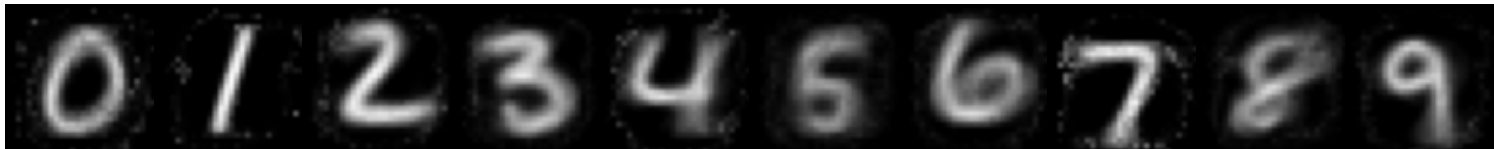

Original



Supplement: supplementary_material [file mnist_RFAE_d_Z.pdf › visual_experiments/results/RFAE/mnist_RFAE_d_Z.pdf]

$k = 1$

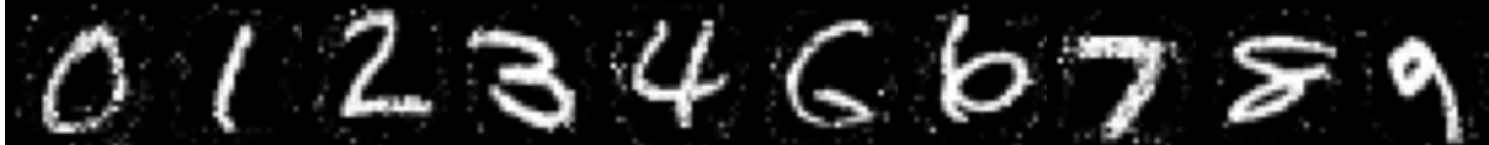

$k = 2$

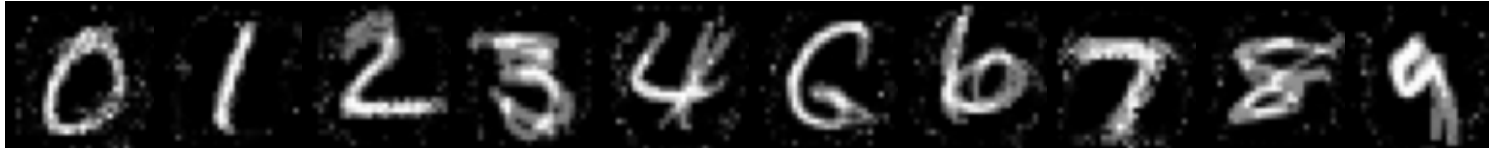

$k = 3$

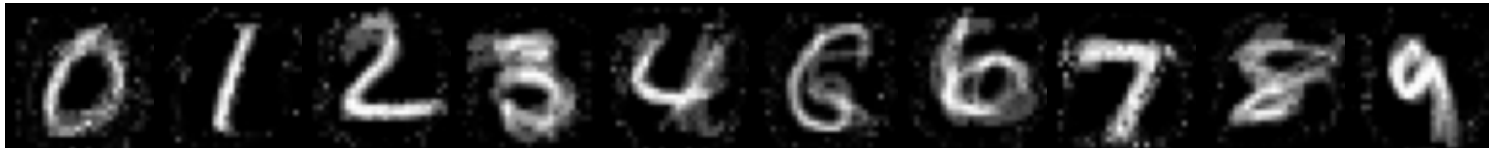

$k = 5$

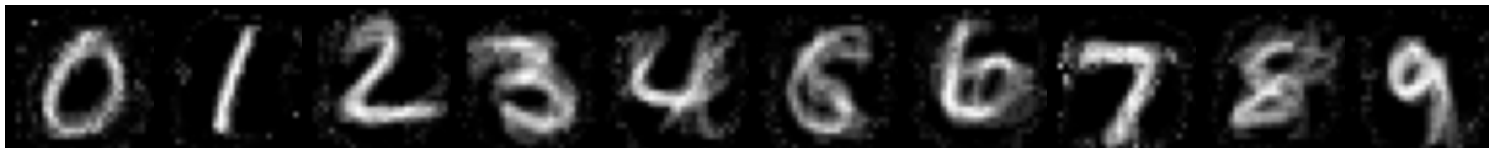

$k = 10$

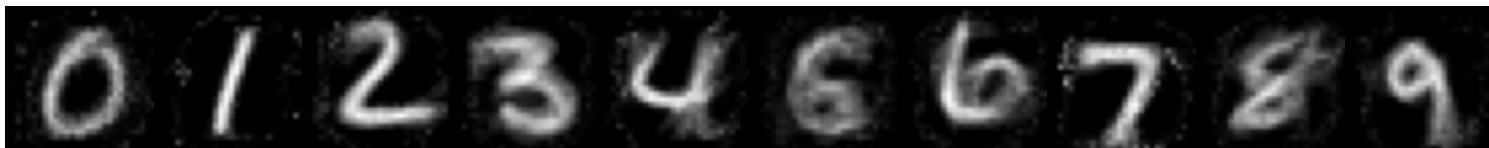

$k = 20$

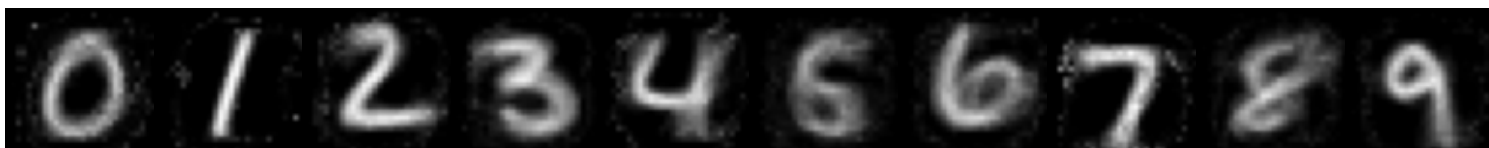

$k = 50$

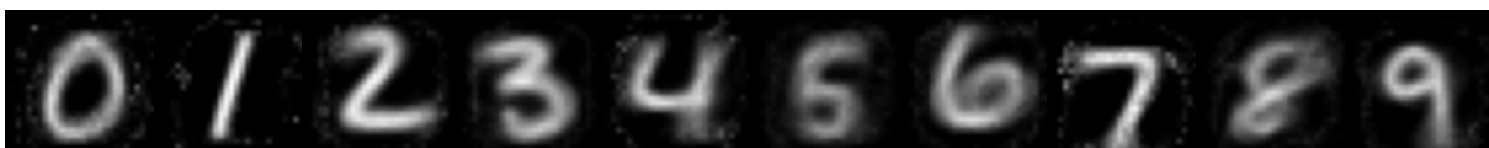

Original

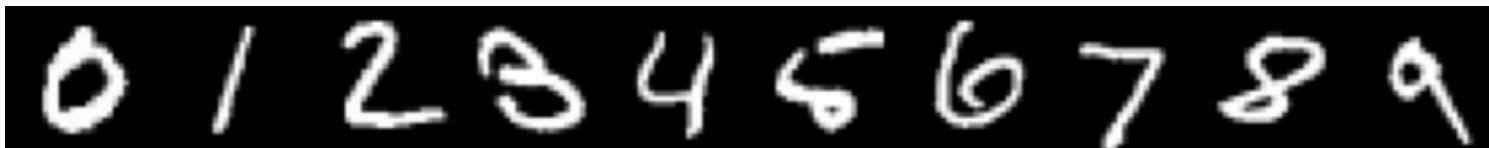

Supplement: supplementary_material [file mnist_RFAE_k.pdf › visual_experiments/results/RFAE/mnist_RFAE_k.pdf]

RFAE (supervised)



RFAE (completely random)



ConvAE



Original



Supplement: supplementary_material [file mnist_RFAE_method_comparison.pdf › visual_experiments/results/RFAE/mnist_RFAE_method_comparison.pdf]

$n_{\text{train\_enc}} = 1000$

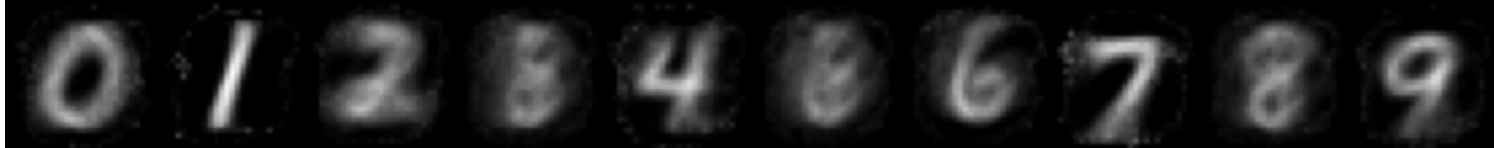

$n_{\text{train\_enc}} = 5000$

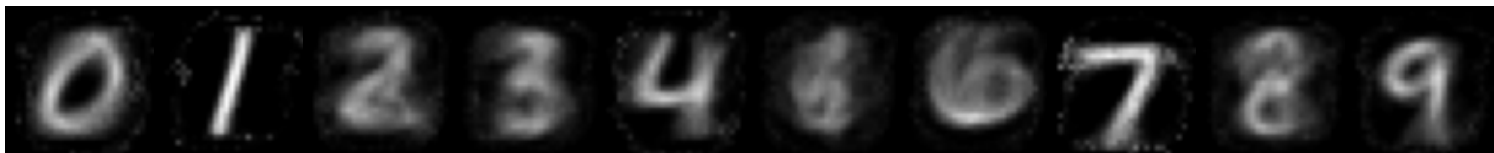

$n_{\text{train\_enc}} = 10000$

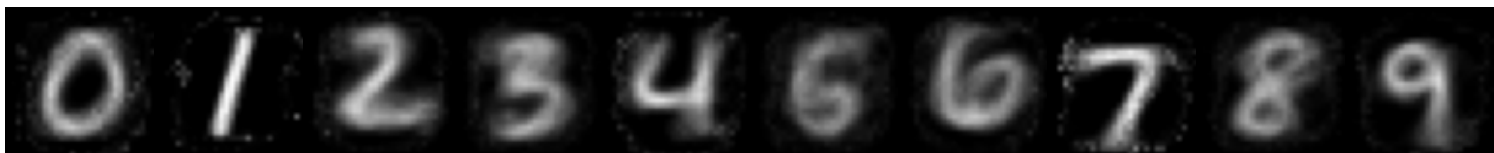

$n_{\text{train\_enc}} = 30000$

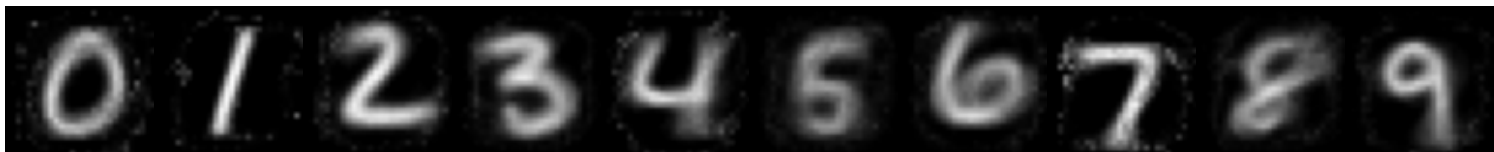

$n_{\text{train\_enc}} = 60000$

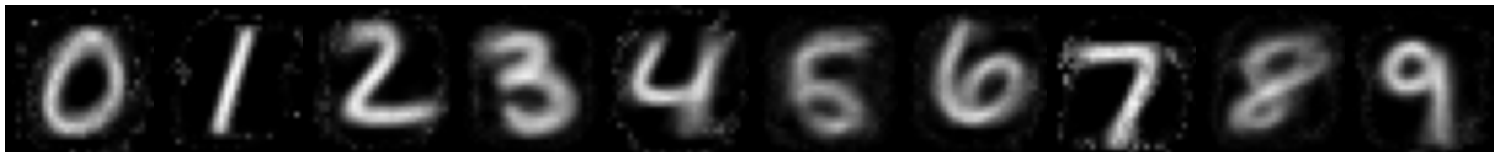

Original

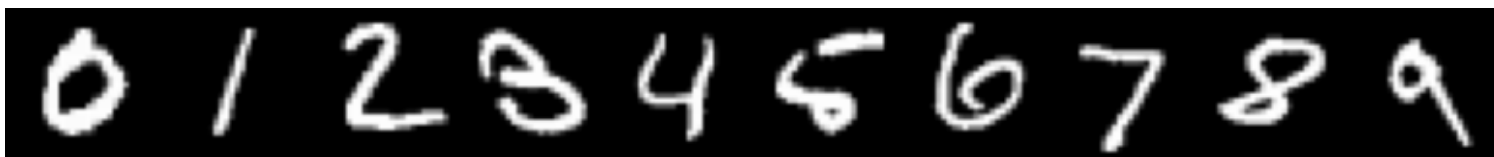

Supplement: supplementary_material [file mnist_RFAE_n_train_enc.pdf › visual_experiments/results/RFAE/mnist_RFAE_n_train_enc.pdf]

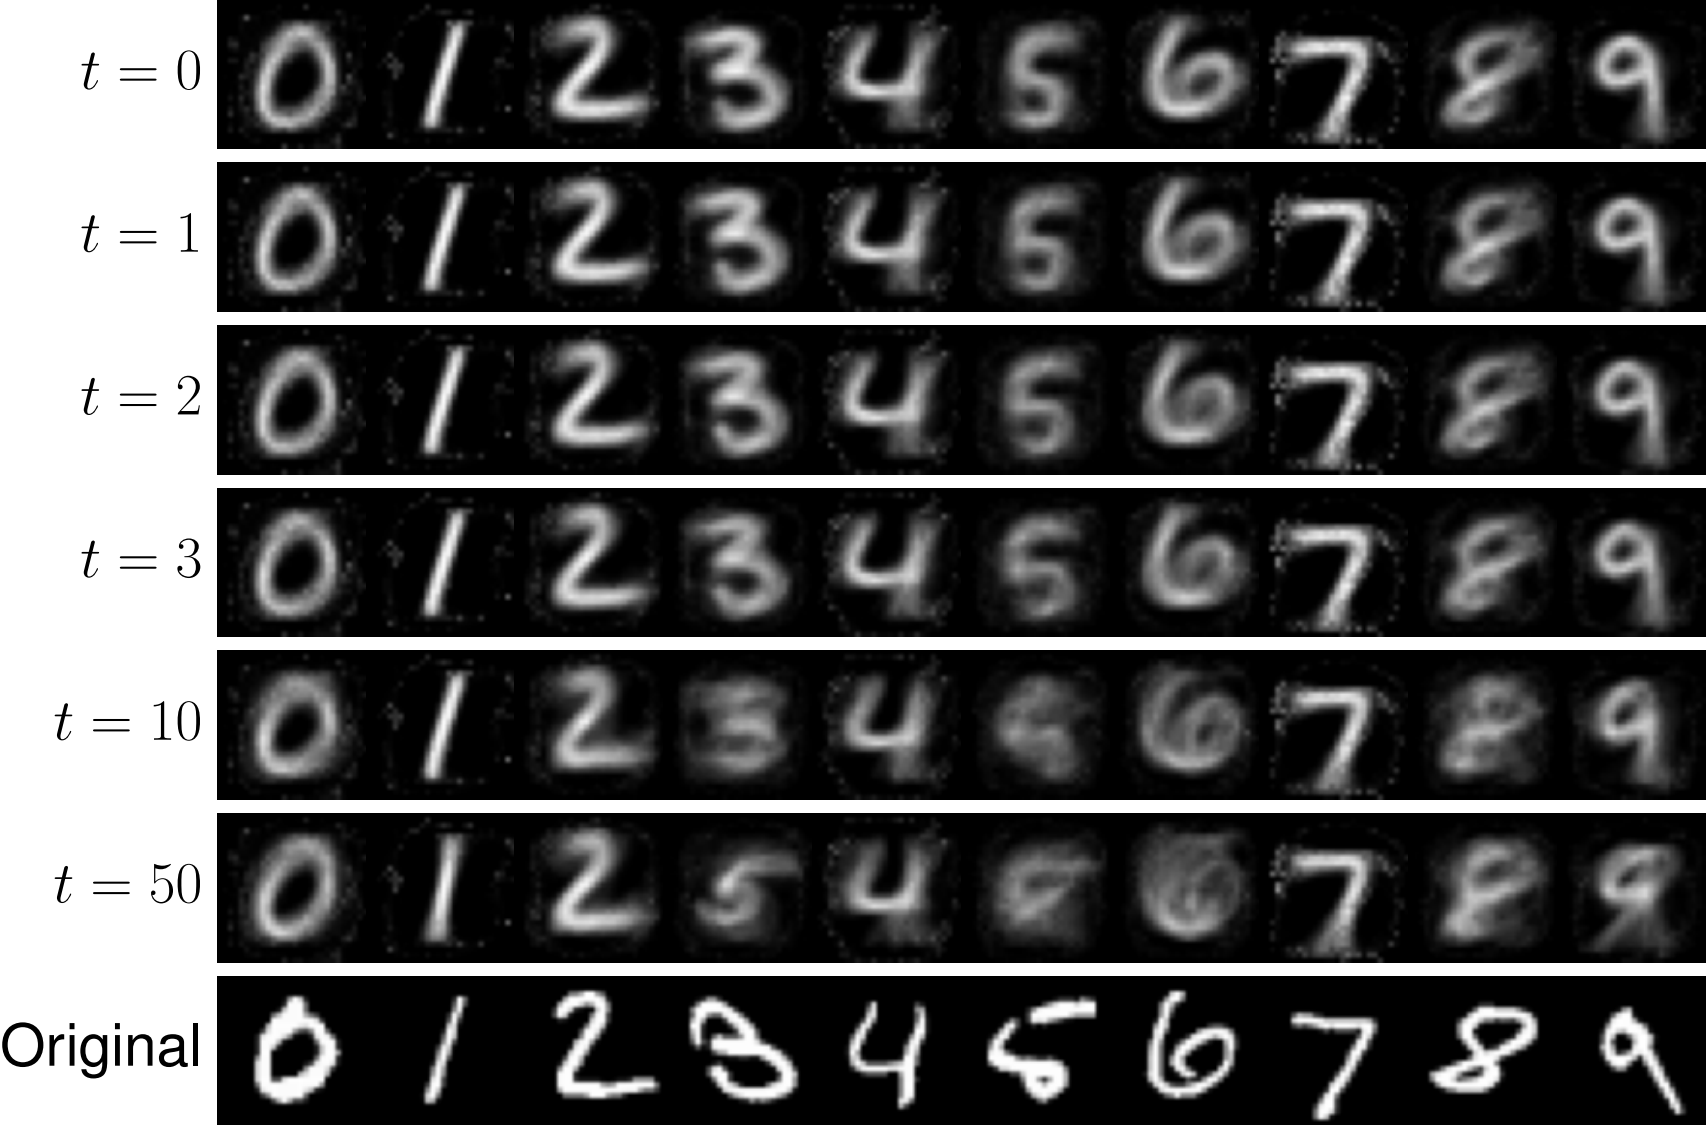

Supplement: supplementary_material [file mnist_RFAE_t.pdf › visual_experiments/results/RFAE/mnist_RFAE_t.pdf]
